# Supplementary material
Source: PubMed Central journal article supplement (PMC4788083)
Supplement: kumg841403.wt1_default.pdf [file kumg841403.wt1_default.pdf]

Supplementary Table 1: Description of the study population for those completing morbidity follow-up and those lost to follow-up

|                                                  | <b>Vitamin D<br/>Completed<br/>follow-up<br/>(n=744)</b> | <b>Vitamin D Lost<br/>to follow-up<br/>(n=295)</b> | <b>Placebo<br/>Completed<br/>follow-up<br/>(n=744)</b> | <b>Placebo Lost<br/>to follow-up<br/>(n=295)</b> |
|--------------------------------------------------|----------------------------------------------------------|----------------------------------------------------|--------------------------------------------------------|--------------------------------------------------|
| Number (%) girls                                 | 392 (53%)                                                | 159 (54%)                                          | 407 (55%)                                              | 151 (51%)                                        |
| Birthweight (kg)                                 | 2.20 (SD 0.17)                                           | 2.23 (SD 0.16)                                     | 2.22 (SD 0.17)                                         | 2.20 (SD 0.18)                                   |
| Mothers age (years)                              | 23.5 (SD 3.2)                                            | 23.7 (SD 3.6)                                      | 23.6 (SD 3.4)                                          | 23.2 (SD 3.6)                                    |
| Mothers body mass index<br>(kg/m <sup>2</sup> )* | 21.2 (SD 3.0)                                            | 21.1 (SD 2.8)                                      | 21.1 (SD 2.9)                                          | 20.7 (SD 2.9)                                    |
| Religion (#, %)                                  |                                                          |                                                    |                                                        |                                                  |
| Hindu                                            | 656 (88%)                                                | 257 (87%)                                          | 664 (89%)                                              | 251 (85%)                                        |
| Muslim                                           | 71 (10%)                                                 | 37 (13%)                                           | 64 (9%)                                                | 39 (13%)                                         |
| Other                                            | 17 (2%)                                                  | 1 (0.3%)                                           | 17 (2%)                                                | 5 (2%)                                           |
| Family type                                      |                                                          |                                                    |                                                        |                                                  |
| Nuclear                                          | 308 (41%)                                                | 154 (52%)                                          | 315 (42%)                                              | 151 (51%)                                        |
| Joint                                            | 290 (39%)                                                | 89 (30%)                                           | 292 (39%)                                              | 84 (28%)                                         |
| Extended                                         | 146 (20%)                                                | 52 (18%)                                           | 138 (19%)                                              | 60 (20%)                                         |
| Family size                                      |                                                          |                                                    |                                                        |                                                  |
| 3 – 5                                            | 388 (52%)                                                | 188 (64%)                                          | 388 (52%)                                              | 176 (60%)                                        |
| 6-9                                              | 277 (37%)                                                | 77 (26%)                                           | 267 (36%)                                              | 94 (32%)                                         |
| >10                                              | 79 (11%)                                                 | 30 (10%)                                           | 90 (12%)                                               | 25 (8%)                                          |
| Average # family members                         | 6.0 (SD 2.8)                                             | 5.5 (SD 2.8)                                       | 6.1(SD 2.8)                                            | 5.6 (SD 2.8)                                     |

|                                 |           |           |           |           |
|---------------------------------|-----------|-----------|-----------|-----------|
| Mothers education               |           |           |           |           |
| None                            | 131 (18%) | 93 (32%)  | 137 (18%) | 84 (28%)  |
| Primary                         | 349 (47%) | 111 (38%) | 343 (46%) | 135 (46%) |
| Secondary                       | 212 (28%) | 71 (24%)  | 212 (28%) | 69 (23%)  |
| college/ university             | 52 (7%)   | 20 (7%)   | 53 (7%)   | 7 (2%)    |
| Fathers education               |           |           |           |           |
| None                            | 68 (9%)   | 37 (13%)  | 67 (9%)   | 36 (12%)  |
| Primary                         | 280 (37%) | 123 (42%) | 316 (42%) | 134 (45%) |
| Secondary                       | 316 (42%) | 103 (35%) | 287 (39%) | 107 (36%) |
| college/ university             | 80 (11%)  | 32 (11%)  | 75 (10%)  | 18 (6%)   |
| Fathers occupation              |           |           |           |           |
| Unemployed/student              | 17 (2%)   | 11 (4%)   | 20 (3%)   | 6 (2%)    |
| Employed                        | 652 (88%) | 265 (90%) | 643 (86%) | 267 (91%) |
| Self-employed                   | 75 (10%)  | 19 (6%)   | 82 (11%)  | 22 (7%)   |
| Mothers occupation              |           |           |           |           |
| Employed                        | 19 (3%)   | 8 (3%)    | 22 (3%)   | 6 (2%)    |
| Unemployed/housewife            | 725 (97%) | 287 (97%) | 723 (97%) | 289 (98%) |
| Asset index score(in quintiles) |           |           |           |           |
| Lowest                          | 135 (18%) | 78 (26%)  | 121 (16%) | 82 (28%)  |
| Low                             | 148 (20%) | 66 (22%)  | 131 (18%) | 71 (24%)  |
| Middle                          | 131 (18%) | 77 (26%)  | 155 (21%) | 53 (18%)  |
| High                            | 156 (21%) | 35 (12%)  | 177 (24%) | 48 (16%)  |
| Highest                         | 174 (23%) | 39 (13%)  | 161 (22%) | 41 (14%)  |

\* n=410, 69, 404, 65 respectively. Comparing those lost to follow-up with those not lost to

follow-up, chi-squared p-values are: sex p=0.79; religion p=0.005; family type p<0.001; family

size  $p < 0.001$ ; mother's education  $p < 0.001$ ; father's education  $p = 0.04$ ; mother's occupation  $p = 0.47$ ; father's occupation  $p = 0.03$ ; SES (asset index)  $p < 0.001$ ; and two sample t-test p-values are: birth weight  $p = 0.25$ ; mother's age  $p = 0.47$ ; maternal BMI  $p = 0.39$ ; number of family members  $p = 0.001$ .

Supplementary Table 2. Incidence of hospitalisations and death among infants receiving at least one dose of vitamin D or placebo and rate ratio of the effect of vitamin D supplementation

|                                     | <b>Incidence rate<sup>1</sup></b> | <b>Incidence rate<sup>1</sup></b> | <b>Unadjusted</b> | <b>P</b> | <b>Adjusted<sup>2</sup> rate</b> | <b>P</b> | <b>Adjusted<sup>3</sup> rate</b> | <b>P</b> |
|-------------------------------------|-----------------------------------|-----------------------------------|-------------------|----------|----------------------------------|----------|----------------------------------|----------|
|                                     | <b>(95% CI)</b>                   | <b>(95% CI)</b>                   | <b>rate ratio</b> |          | <b>ratio (95% CI)</b>            |          | <b>ratio (95% CI)</b>            |          |
|                                     | <b>Vitamin D</b>                  | <b>Placebo</b>                    | <b>(95% CI)</b>   |          |                                  |          |                                  |          |
| N                                   | 969                               | 957                               | 1926              |          | 1926                             |          | 1805                             |          |
| <u>Inpatient admission or death</u> |                                   |                                   |                   |          |                                  |          |                                  |          |
| # of events                         | 86                                | 88                                |                   |          |                                  |          |                                  |          |
| Rate/ child-year                    | 0.21                              | 0.21                              | 0.99              | 0.94     | 0.98                             | 0.92     | 0.98                             | 0.93     |
|                                     | (0.17 to 0.26)                    | (0.17 to 0.27)                    | (0.71 to 1.37)    |          | (0.71 to 1.37)                   |          | (0.70 to 1.38)                   |          |
| <u>Death</u>                        |                                   |                                   |                   |          |                                  |          |                                  |          |
| # of events                         | 15                                | 9                                 |                   |          |                                  |          |                                  |          |
| Rate/ child-year                    | 0.036                             | 0.021                             | 1.68              | 0.22     | 1.63                             | 0.25     | 1.97                             | 0.18     |
|                                     | (0.022 to 0.063)                  | (0.011 to 0.045)                  | (0.73 to 3.83)    |          | (0.71 to 3.74)                   |          | (0.74 to 5.28)                   |          |
| <u>Any severe morbidity</u>         |                                   |                                   |                   |          |                                  |          |                                  |          |
| # of events                         | 167                               | 196                               |                   |          |                                  |          |                                  |          |
| Rate/ child-year                    | 0.40                              | 0.46                              | 0.86              | 0.21     | 0.85                             | 0.18     | 0.86                             | 0.22     |
|                                     | (0.34 to 0.48)                    | (0.40 to 0.54)                    | (0.69 to 1.09)    |          | (0.68 to 1.07)                   |          | (0.69 to 1.09)                   |          |

<sup>1</sup>Total person-time in the vitamin D group was 419 child-years and in the placebo group was 422 child-years.

<sup>2</sup>Adjusted for sex, SES quintile, family type, mother's education level

<sup>3</sup>Adjusted for sex, SES quintile, family type, mother's education level, exclusive breastfeeding status, sunlight exposure and season

n=900 vitamin D arm and n=905 placebo arm
